# Supplementary material
Source: HighWire-hosted journal article supplement (https://www.canjsurg.ca/highwire/filestream/98149/field_highwire_adjunct_files/0/CJS-021721-at-1.pdf)
Supplement: CJS-021721-at-1.pdf [file CJS-021721-at-1.pdf]

**Appendix 1** to Patel YS, Kay M, Churchill IF, et al. Robotic thoracic surgery in Canada: Are patients willing to pay out of pocket? *Can J Surg* 2022. Copyright © 2022 The Author(s) or their employer(s). To receive this resource in an accessible format, please contact us at [cmajgroup@cmaj.ca](mailto:cmajgroup@cmaj.ca).

DOI: 10.1503/cjs.021721

*Online appendices are unedited and posted as supplied by the authors.*

## Willingness to Pay: A Survey of Patient's Willingness to Contribute to the Cost of Robotic Thoracic Surgery

---

### 1. Demographics

- a. Age at Surgery: \_\_\_\_\_
- b. Gender: 1. Male; 2. Female
- c. Ethnicity: 1. Caucasian; 2. Non-Caucasian
- d. Education Level: 1. Elementary School; 2. High School; 3. College; 4. University Undergraduate; 5. University Graduate; 6. Professional School; 7. Prefer not to Answer
- e. Annual Income at the Time of Surgery: 1. \$0 to \$19,999; 2. \$20,000 to \$39,999; 3. \$40,000 to \$59,999; 4. \$60,000 to \$79,999; 5. \$80,000 to \$99,999; 6. \$100,000 or more; 7. Prefer not to Answer
- f. Insurance at the Time of Surgery: 1. Ontario Health Insurance Plan (OHIP); 2. Private; 3. Both OHIP and Private; 4. No Insurance

### 2. Please rate your overall experience with robotic surgery.

|      |   |   |          |   |   |   |           |   |    |
|------|---|---|----------|---|---|---|-----------|---|----|
| 1    | 2 | 3 | 4        | 5 | 6 | 7 | 8         | 9 | 10 |
| Poor |   |   | Moderate |   |   |   | Excellent |   |    |

### 3. Please rate your experience with the wait time for your robotic surgery.

|           |       |          |      |          |
|-----------|-------|----------|------|----------|
| Too short | Short | Adequate | Long | Too long |
|-----------|-------|----------|------|----------|

### 4. Please rate your overall post-operative experience in the hospital.

|                  |             |         |           |                |
|------------------|-------------|---------|-----------|----------------|
| Very unsatisfied | Unsatisfied | Neutral | Satisfied | Very Satisfied |
|------------------|-------------|---------|-----------|----------------|

### 5. Please rate your overall post-operative experience after discharge from the hospital.

|                  |             |         |           |                |
|------------------|-------------|---------|-----------|----------------|
| Very unsatisfied | Unsatisfied | Neutral | Satisfied | Very Satisfied |
|------------------|-------------|---------|-----------|----------------|

### 6. Robotic thoracic surgery costs an additional \$2,000 that the government does not fund. In case research funding was not available, would you have paid \$2,000 for your robotic surgery?

- Yes  
 No

*If "Yes," move onto Question #7.*

#### b) If no, how much would you have been willing to pay for the robotic surgery?

**Appendix 1** to Patel YS, Kay M, Churchill IF, et al. Robotic thoracic surgery in Canada: Are patients willing to pay out of pocket? *Can J Surg* 2022. Copyright © 2022 The Author(s) or their employer(s). To receive this resource in an accessible format, please contact us at [cmajgroup@cmaj.ca](mailto:cmajgroup@cmaj.ca).

DOI: 10.1503/cjs.021721

*Online appendices are unedited and posted as supplied by the authors.*

- \$0
- \$1-\$499
- \$500-\$999
- \$1,000-\$1,499
- \$1,500-\$1,999

**7. Standard robotic surgery has a wait time of approximately 3-4 weeks. Would you have paid to shorten your wait time for robotic surgery?**

- Yes
  - No
-
